# Supplementary material
Source: publisher site journal article supplement (https://www.dovepress.com/get_supplementary_file.php?f=344282.docx)
Supplement: Supplementary file 1 [file get_supplementary_file.php]

Supplementary materials

**Supplementary Table 1. The demographic, clinical, and routine laboratory data for patients on the same day of serum sample collection.**

| Variable a | Sepsis (n=36) | Non-sepsis (n=43) | P-value b |
| --- | --- | --- | --- |
| **Demographics** |  |  |  |
| Age | 63.1 ± 15.7 | 59.6 ± 14.6 | 0.014 |
| Sex M, F | 16 (44%), 20 (56%) | 21 (49%), 22 (51%) | 0.653 |
| BMI | 29.8 ± 9.7 | 29.4 ± 5.9 | 0.354 |
| **Routine laboratory data** |  |  |  |
| Hemoglobin (g/dL) | 9.1 ± 2.3 | 10.7 ± 2.0 | 0.219 |
| Packed cell volume (%) | 29.2 ± 7.3 | 33.0 ± 6.4 | 0.852 |
| WBC count × 109/L | 14.1 ± 7.6 | 11.0 ± 5.2 | 0.748 |
| Neutrophils (N) × 109/L | 8.4 ± 1.0 | 8.02 ± 0.9 | 0.337 |
| Lymphocytes (L) × 109/L | 10.5 ± 1.0 | 1.23 ± 0.9 | 0.993 |
| N/L ratio | 15.1 ± 19.7 | 10.1 ± 7.9 | 0.545 |
| Platelets × 109/L | 209.9 ± 137.8 | 258.6 ± 128.2 | 0.495 |
| Sodium (mmol/L) | 138.6 ± 7.0 | 140.0 ± 5.4 | 0.892 |
| Potassium (mmol/L) | 4.4 ± 0.8 | 4.1 ± 0.6 | 0.305 |
| Chloride (mmol/L) | 102.2 ± 10.9 | 104.5 ± 9.1 | 0.520 |
| Creatinine (mg/dl) | 2.4 ± 2.2 | 1.0 ± 0.8 | 0.114 |
| RBS (mg/dl) | 206.5 ± 147.3 | 145.2 ± 61.1 | 0.204 |
| **Vital signs** |  |  |  |
| Heart rate | 95.5 ± 24.9 | 86.6 ± 20.5 | 0.265 |
| Temperature | 37.1 ± 1.1 | 36.2 ± 3.4 | 0.170 |
| Respiratory rate | 20.3 ± 5.0 | 25.4 ± 23.5 | 0.922 |
| Systolic BP | 115.2 ± 27.2 | 127.6 ± 20.5 | 0.554 |
| Diastolic BP | 65.9 ± 16.5 | 74.6 ± 13.5 | 0.438 |
| MAP | 79.9 ± 18.1 | 87.7 ± 18.7 | 0.590 |
| SOFA score |  |  |  |
| Total SOFA | 8.3 ± 4.8 | 3.1 ± 3.5 | <0.001 |
| Respiratory SOFA | 2.1 ± 1.3 | 1.1 ± 1.2 | 0.020 |
| Coagulation SOFA | 0.7 ± 1.1 | 0.3 ± 0.7 | 0.281 |
| Hepatic SOFA | 1.0 ± 1.1 | 0.4 ± 0.7 | 0.008 |
| Cardiovascular SOFA | 2.2 ± 1.9 | 0.5 ± 1.3 | 0.001 |
| CNS SOFA | 0.9 ± 1.4 | 0.5 ± 1.2 | 0.227 |
| Renal SOFA | 1.5 ± 1.4 | 0.3 ± 0.7 | 0.002 |
|  |  |  |  |
| **Service unit** |  |  | 0.253 |
| Surgical ICU | 33 (47.8%) | 36 (52.2%) | 0.332 |
| Medical ICU | 0 (0%) | 3 (100%) | 0.246 |
| Anaesthesia ICU | 2 (50%) | 2 (50%) | 1.000 |
| Shared between the three ICUs | 1 (33.3%) | 2 (66.7%) | 1.000 |
| **Source of admission** |  |  |  |
| - Emergency | 13 (36.1%) | 23 (63.9%) | 0.174 |
| - Hospital wards | 12 (70.6%) | 5 (29.4%) | 0.028 |
| - Operations room | 8 (40%) | 12 (60%) | 0.612 |
| - Dialysis unit | 2 (100%) | 0 (0%) | 0.204 |
| - Other | 1 (25%) | 3 (75%) | 0.621 |
| **Reason(s) for admission c** |  |  |  |
| - Post operation | 10 (45.5%) | 12 (54.5%) | 1.000 |
| - Bowel Obstruction | 3 (33.3%) | 6 (66.7%) | 0.498 |
| - Due to sepsis | 25 (100%) | 0 (0%) | <0.001 |
| - Lower limb ischemia | 2 (100%) | 0 (0%) | 0.204 |
| - Renal disease | 10 (43.5%) | 13 (56.5%) | 1.000 |
| others | 28 (46.7%) | 32 (53.3%) | 0.796 |
| **Comorbidities** |  |  |  |
| Number of comorbidities | 1.8 ± 1.4 | 1.5± 1.1 | 0.267 |
| None | 7 (50%) | 7 (50%) |  |
| 1-3 | 25 (42.4%) | 34 (57.6%) |  |
| ≥4 | 4 (66.7%) | 2 (33.3%) |  |
| Types: |  |  |  |
| CVD | 5 (83.3%) | 1 (16.7%) | 0.087 |
| Dementia | 0 (0%) | 3 (100%) | 0.246 |
| Liver diseases | 0 | 0 | - |
| Peptic ulcer | 0 | 0 | - |
| CTD | 0 | 0 | - |
| Cancer | 11 (64.7%) | 6 (35.3%) | 0.100 |
| Renal diseases | 14 (48.3%) | 15 (51.7%) | 0.816 |
| IHD | 6 (46.2%) | 7 (53.8%) | 1.000 |
| Heart failure | 13 (44.8%) | 16 (55.2%) | 1.000 |
| Diabetes | 20 (48.8%) | 21 (51.2%) | 0.653 |
| COPD | 3 (60%) | 2 (40%) | 0.655 |
| **Hypertension** | 26 (52%) | 24 (48%) | 0.163 |
| **ICU LOS in days** | 11.8 ± 10.7 | 9.3 ± 9.2 | 0.198 |
| **Hospital LOS in days** | 15.9 ± 10.5 | 17.2± 18.7 | 0.097 |

a All results are presented as count and percent (n (%)) for categorical variables and (mean ± SD) for continuous variables. Measurement units: Age; years, BMI; kg/m2, Heart rate; beat/minute, Temperature; ℃, Respiratory rate; breaths/minute, Systolic/Diastolic/MAP BP; mmHg. RBS; random blood sugar, MAP; Mean arterial pressure. CVD; Cerebrovascular diseases, CTD; connective tissue disease, IHD; Ischemic heart disease, COPD; Chronic obstructive pulmonary disease. LOS; length of stay. b Fisher’s exact test was used to determine statistical significance. c More than one reason for admission was reported for each patient as designated by the attending clinician.


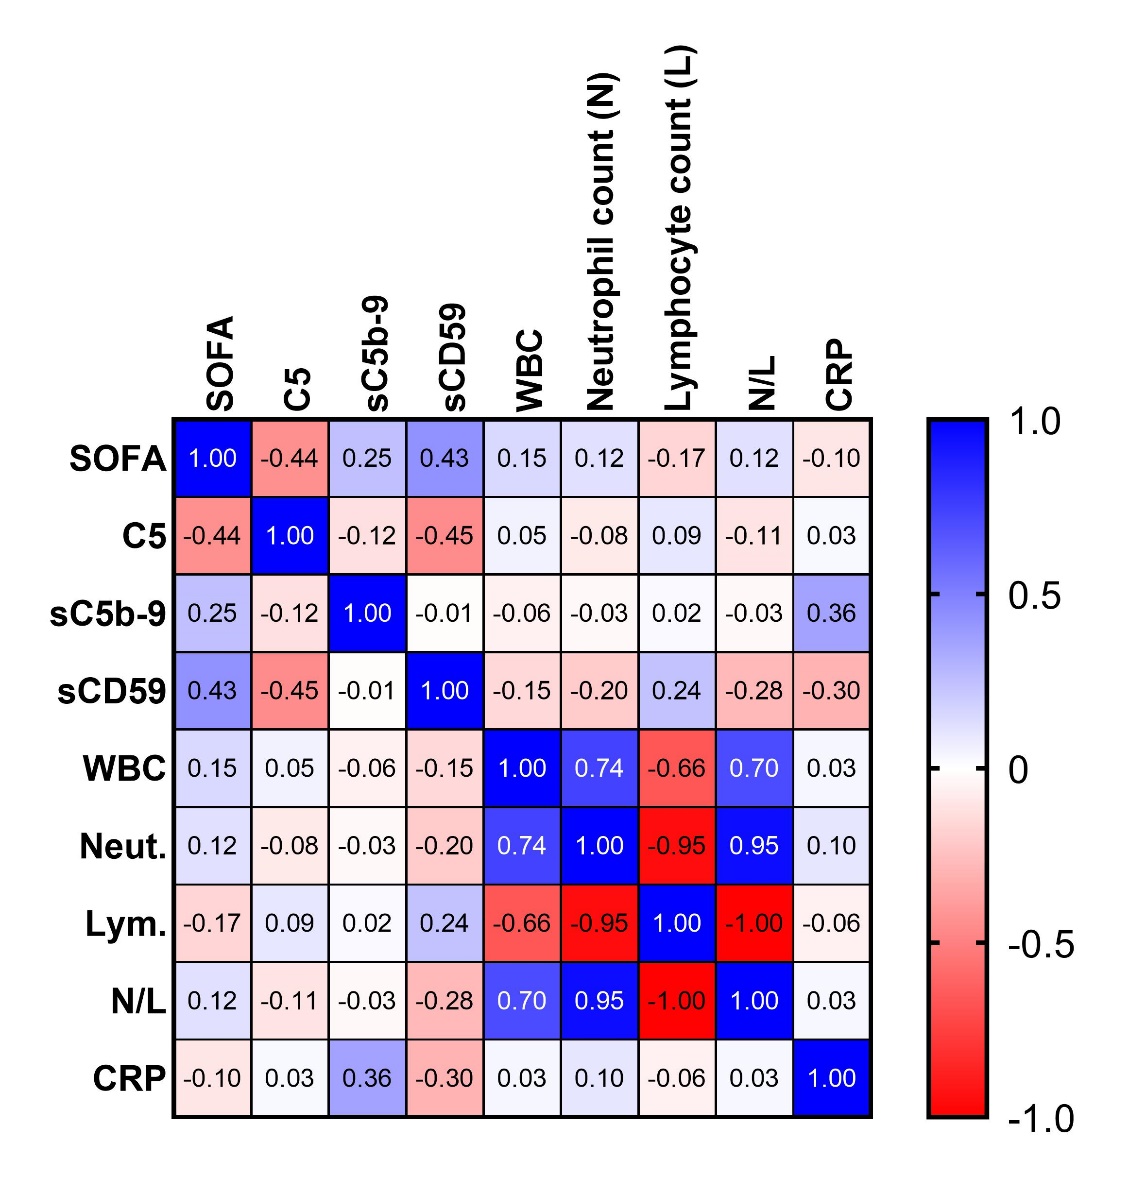


**Supplementary Figure 1. Correlation matrix of terminal pathway activation parameters, systemic markers of inflammation, and SOFA score**. Spearman’s correlation coefficient (*r*s) was used to assess the correlation of each column with each other column and a correlation matrix was generated. The values inside the squares represent *r*s.
